# Supplementary material for: Crystal structure, magnetism, and dielectric properties based on the axially chiral ligand 2,2′-dinitro-4,4′-biphenyldicarboxylic acid
Source: Royal Society of Chemistry journal article supplement (doi:10.1039/c5ce02426a), 2016-01-01
Supplement: c5ce02426a1.pdf [file c5ce02426a1.pdf]

## Support Information

### Crystal Structure, Magnetism, and Dielectric Properties Based on Axial chirality Ligand 2, 2'-Dinitro-4, 4'-Biphenyldicarboxylic Acid

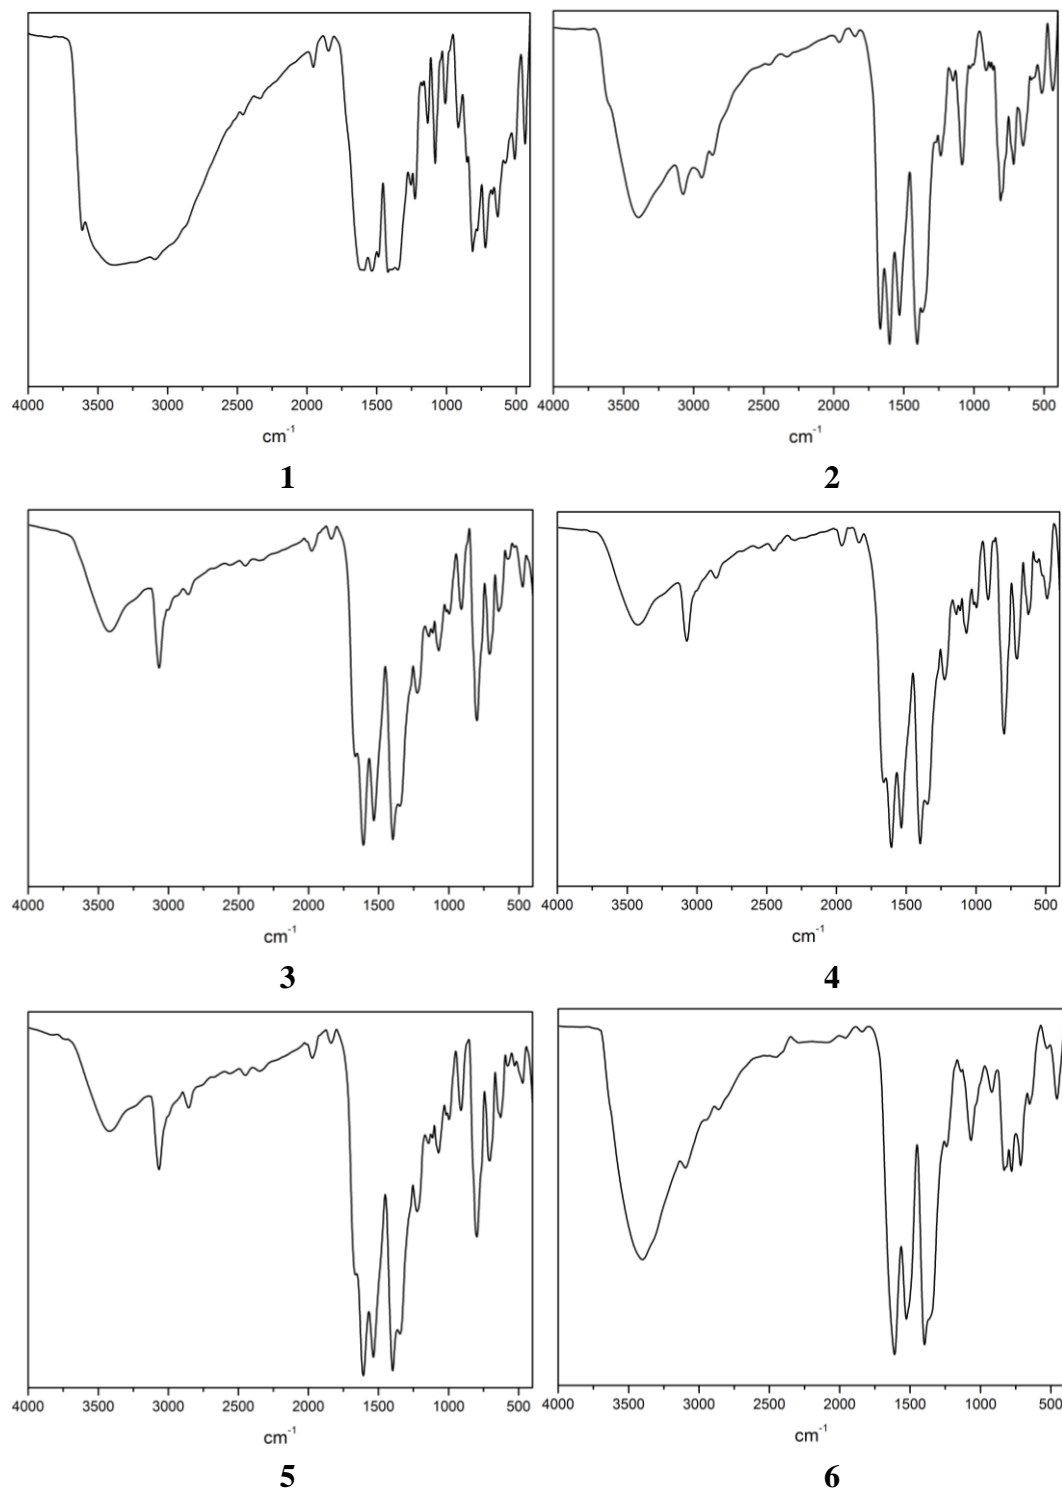

**Figure S1:** The measurement of IR of complexes 1-6.

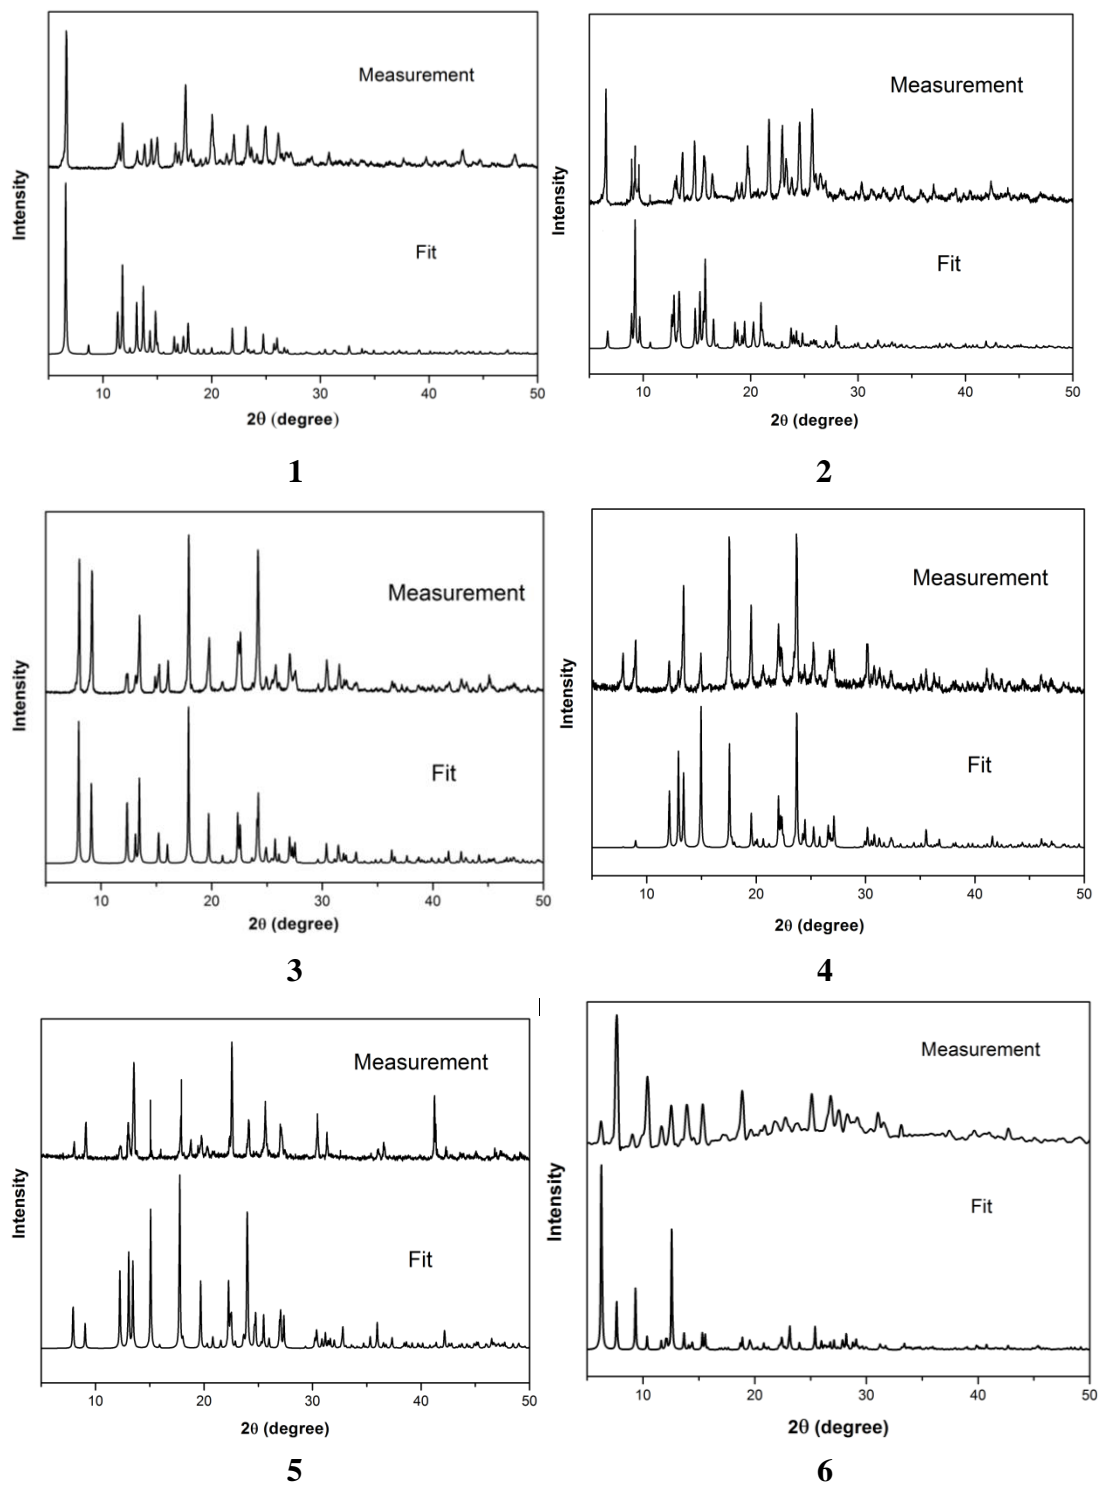

**Figure S2:** XRPD pattern of compounds **1-6**, where the lower line is the simulated pattern.

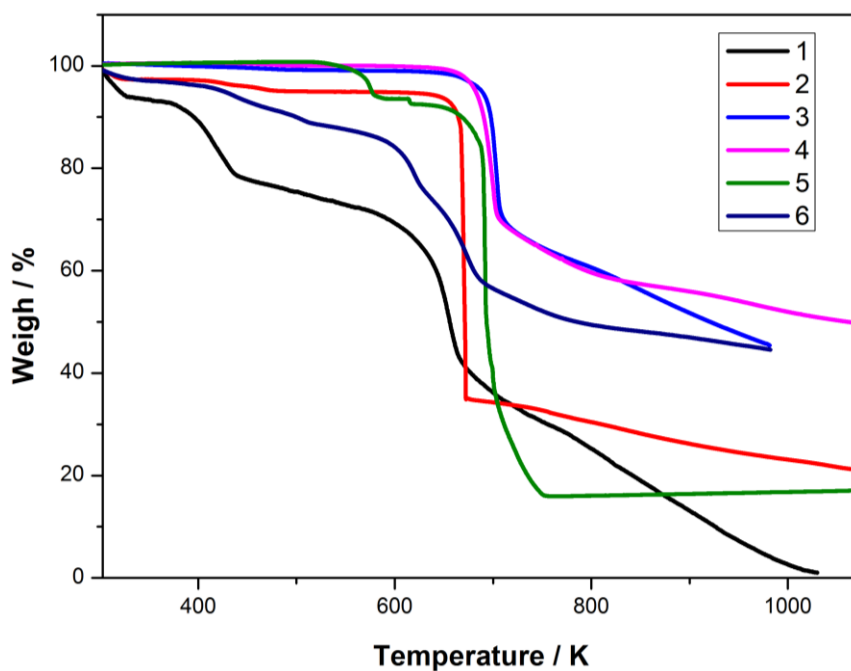

**Figure S3:** The thermal gravimetric (TG) stability of complexes of **1-6**.

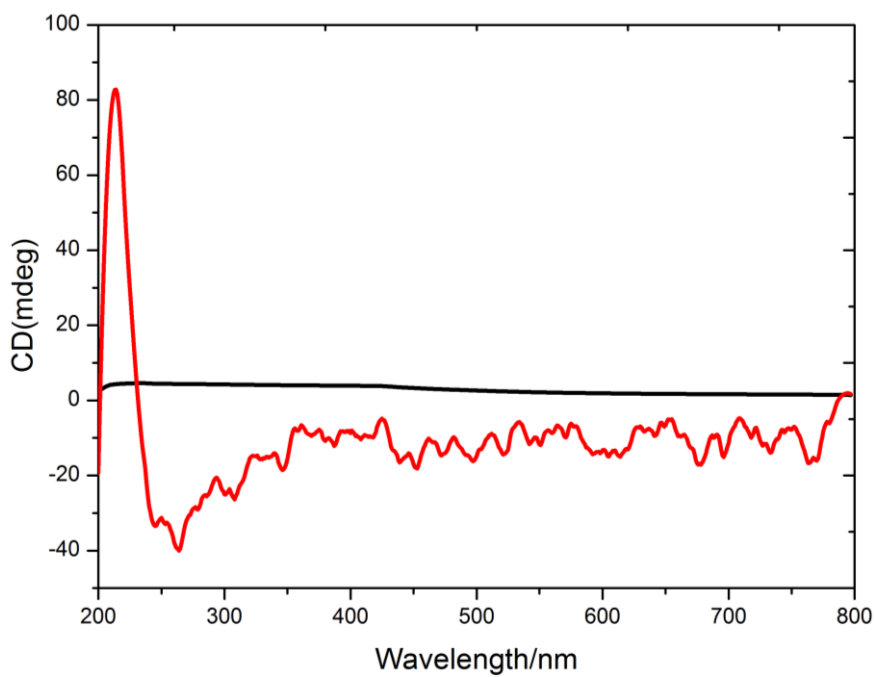

**Figure S4:** Circular Dichroism (CD) of ligand by using KBr pellets at room temperature

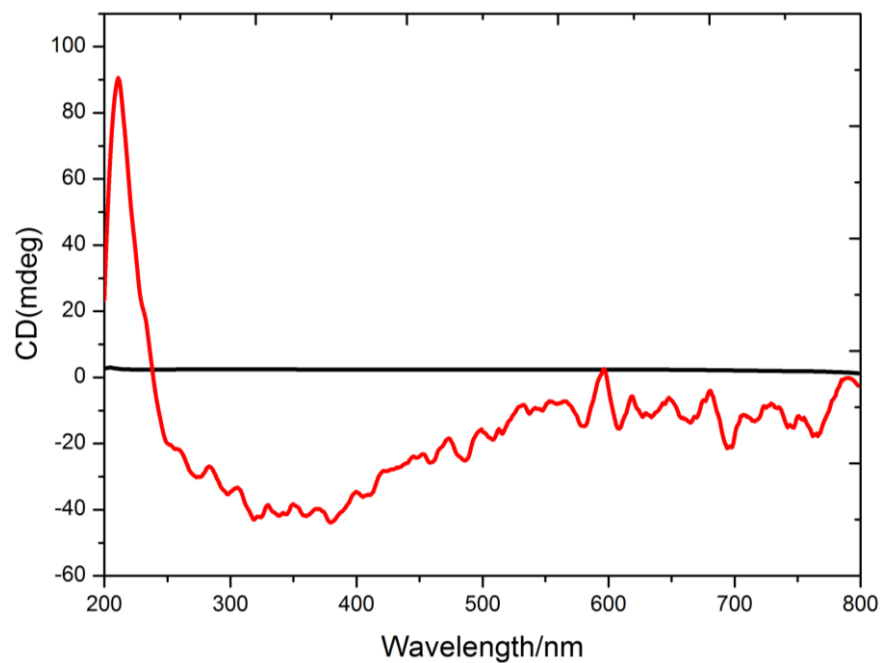

**Figure S5:** Circular Dichroism (CD) of complex **1** by using KBr pellets at room temperature

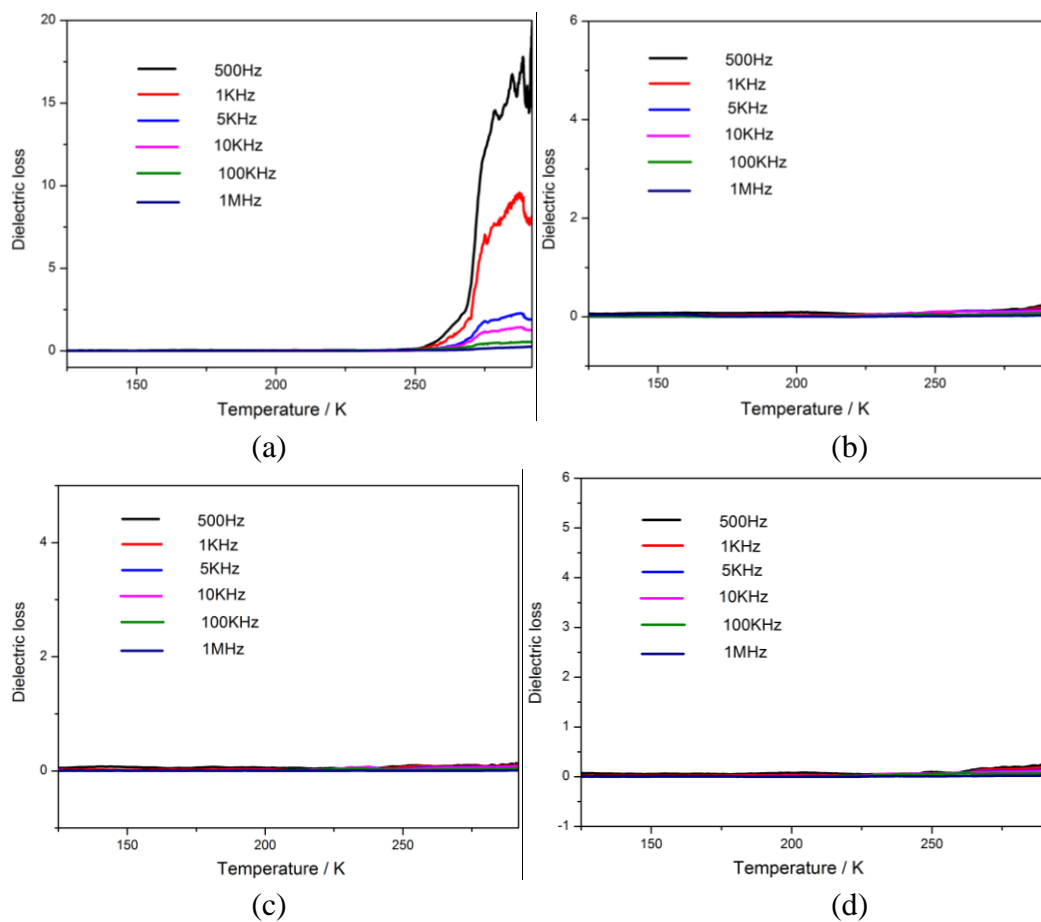

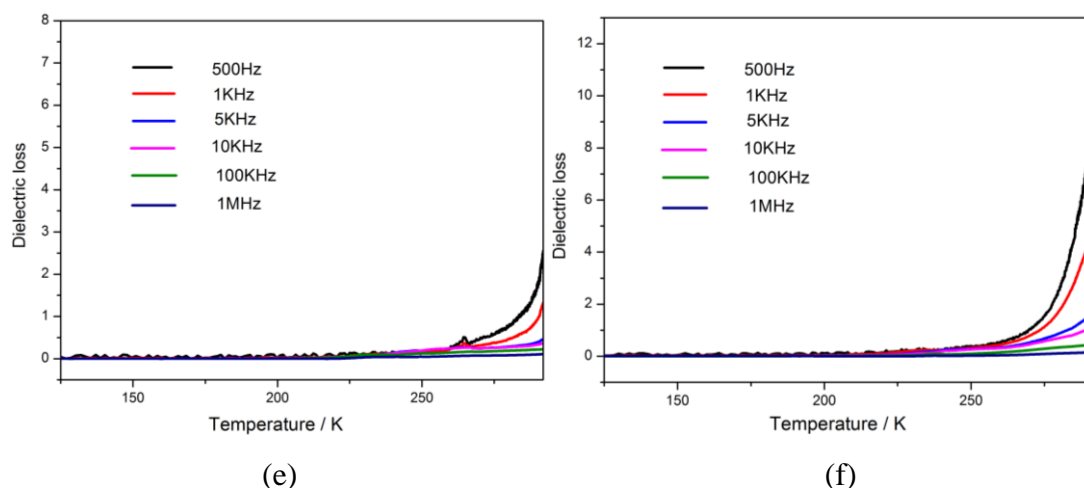

**Figure S6:** Dielectric loss of complexes **1-6** as a function of temperature at several frequencies, measured based on pellets from their powdered samples from 125 K to 292 K.

**Table S1:** Selected Bond Lengths ( $\text{\AA}$ ) and Bond Angles ( $^\circ$ ) of **1**

|                 |            |                 |           |                 |            |
|-----------------|------------|-----------------|-----------|-----------------|------------|
| Ni(1)–O(1)      | 2.116(3)   | Ni(1)–N(1)      | 2.055(5)  | Ni(1)–O(3)      | 2.021(3)   |
| Ni(1)–N(2)      | 2.075(5)   | Ni(1)–O(2)      | 2.142(4)  | Ni(1)–O(9)      | 2.116(4)   |
| O(3)–Ni(1)–N(1) | 96.68(17)  | O(3)–Ni(1)–N(2) | 88.09(16) | N(2)–Ni(1)–N(1) | 92.64(18)  |
| O(3)–Ni(1)–O(1) | 163.32(16) | N(1)–Ni(1)–O(1) | 99.89(17) | O(1)–Ni(1)–N(2) | 89.18(17)  |
| O(3)–Ni(1)–O(9) | 90.38(14)  | N(1)–Ni(1)–O(9) | 89.31(18) | N(2)–Ni(1)–O(9) | 177.64(18) |
| O(3)–Ni(1)–O(2) | 101.08(15) | O(9)–Ni(1)–O(2) | 89.28(16) | N(1)–Ni(1)–O(2) | 162.20(16) |
| N(2)–Ni(1)–O(2) | 89.26(17)  | O(1)–Ni(1)–O(9) | 91.78(15) | O(1)–Ni(1)–O(2) | 62.42(15)  |

**Table S2:** Selected Bond Lengths ( $\text{\AA}$ ) and Bond Angles ( $^\circ$ ) of **2**

|                               |           |                               |          |                                |          |
|-------------------------------|-----------|-------------------------------|----------|--------------------------------|----------|
| Ni(1)–O(1)                    | 2.033(5)  | Ni(2)–O(8)                    | 2.022(6) | Ni(2)–N(5)                     | 2.085(8) |
| Ni(1)–O(13)                   | 2.071(5)  | Ni(2)–O(9)                    | 2.140(5) | Ni(2)–O(7) <sup>#1</sup>       | 2.004(5) |
| Ni(1)–N(1)                    | 2.113(6)  | Ni(2)–O(10)                   | 2.142(5) | Ni(2)–N(6) <sup>#2</sup>       | 2.072(8) |
| O(1)–Ni(1)–O(13)              | 91.54(18) | O(1)–Ni(1)–N(1)               | 91.0(2)  | O(13)–Ni(1)–N(1)               | 92.1(2)  |
| O(8)–Ni(2)–O(9)               | 93.7(2)   | O(8)–Ni(2)–O(10)              | 155.5(2) | O(8)–Ni(2)–N(5)                | 86.0(3)  |
| O(10)–Ni(2)–N(5)              | 91.5(2)   | O(9)–Ni(2)–O(10)              | 61.9(2)  | O(9)–Ni(2)–N(5)                | 88.9(3)  |
| O(7)–Ni(2)–N(6) <sup>#2</sup> | 94.6(3)   | O(8)–Ni(2)–O(7) <sup>#1</sup> | 108.4(2) | O(8)–Ni(2)–N(6) <sup>#2</sup>  | 92.2(3)  |
| O(9)–Ni(2)–O(7) <sup>#1</sup> | 157.7(2)  | O(9)–Ni(2)–N(6) <sup>#2</sup> | 87.7(3)  | O(10)–Ni(2)–O(7) <sup>#1</sup> | 96.0(2)  |
| O(10)–Ni(2)–N(5)              | 91.5(2)   | O(7)–Ni(2)–N(5) <sup>#1</sup> | 89.2(3)  | N(5)–Ni(2)–N(6) <sup>#2</sup>  | 176.1(3) |

Symmetry transformation: #1 2-x,2-y,2-z; #2 x,2-y,1/2+z

**Table S3:** Selected Bond Lengths ( $\text{\AA}$ ) and Bond Angles ( $^\circ$ ) of **3-5**

|                                   |           |                                 |            |                                   |            |
|-----------------------------------|-----------|---------------------------------|------------|-----------------------------------|------------|
| Ni(1)–O(0AA)                      | 2.061(4)  | Ni(1)–O(1AA)                    | 2.070(4)   | Ni(1)–N(2)                        | 2.091(4)   |
| Mn(1)–O(1)                        | 2.127(2)  | Mn(1)–O(2) <sup>#1</sup>        | 2.158(2)   | Mn(1)–N(2)                        | 2.282(3)   |
| Co(1)–O(1)                        | 2.090(3)  | Co(1)–O(2)                      | 2.077(2)   | Co(1)–N(3)                        | 2.154(3)   |
| O(0AA)–Ni(1)–O(1AA)               | 88.62(16) | O(0AA)–Ni(1)–N(2)               | 84.99(16)  | O(0AA)–Ni(1)–O(0AA) <sup>#1</sup> | 174.27(16) |
| O(0AA)–Ni(1)–O(1AA) <sup>#1</sup> | 95.60(16) | O(0AA)–Ni(1)–N(2) <sup>#1</sup> | 91.06(16)  | O(1AA)–Ni(1)–N(2)                 | 90.93(16)  |
| O(1AA)–Ni(1)–O(1AA) <sup>#1</sup> | 85.24(16) | O(1AA)–Ni(1)–N(2) <sup>#1</sup> | 176.11(16) | N(2)–Ni(1)–N(2) <sup>#1</sup>     | 92.91(16)  |

|                               |            |                               |            |                               |           |
|-------------------------------|------------|-------------------------------|------------|-------------------------------|-----------|
| O(1)–Mn(1)–O(2)               | 99.93(9)   | O(1)–Mn(1)–N(2)               | 90.19(10)  | O(1)–Mn(1)–O(1) <sup>#1</sup> | 89.15(14) |
| O(1)–Mn(1)–O(2) <sup>#1</sup> | 89.48(9)   | O(1)–Mn(1)–N(2) <sup>#1</sup> | 176.68(10) | O(2)–Mn(1)–N(2) <sup>#1</sup> | 83.31(9)  |
| O(2)–Mn(1)–O(2) <sup>#1</sup> | 166.83(13) | O(2)–Mn(1)–N(2)               | 87.43(9)   | N(2)–Mn(1)–N(2) <sup>#1</sup> | 90.64(10) |
| O(1)–Co(1)–O(2)               | 96.32(10)  | O(1)–Co(1)–N(3)               | 90.88(10)  | O(1)–Co(1)–O(1) <sup>#2</sup> | 86.11(10) |
| O(1)–Co(1)–O(2) <sup>#2</sup> | 89.23(10)  | O(1)–Co(1)–N(3) <sup>#2</sup> | 176.78(11) | O(2)–Co(1)–N(3)               | 89.97(10) |
| O(2)–Co(1)–O(2) <sup>#2</sup> | 172.41(11) | O(2)–Co(1)–N(3) <sup>#2</sup> | 84.76(10)  | N(3)–Co(1)–N(3) <sup>#2</sup> | 92.15(11) |

Symmetry transformation: #1 1-x, y, 1/2-z ;#2 -x, y, 5/2-z

**Table S4:** Selected Bond Lengths (Å) and Bond Angles (°) of **6**

|                   |          |                                 |           |                                |           |
|-------------------|----------|---------------------------------|-----------|--------------------------------|-----------|
| Zn(1)–O(13)       | 1.935(5) | Zn(1)–N(2)                      | 2.117(17) | Zn(2)–N(1)                     | 2.09(3)   |
| Zn(1)–O(12)       | 1.943(5) | Zn(2)–O(13) <sup>#1</sup>       | 2.053(5)  | Zn(2)–O(1)                     | 2.162(6)  |
| Zn(1)–O(2)        | 1.976(5) | Zn(2)–O(5)                      | 2.058(5)  | Zn(2)–O(11)                    | 2.132(5)  |
| O(2)–Zn(1)–O(12)  | 120.0(3) | O(2)–Zn(1)–O(13)                | 101.4(2)  | O(2)–Zn(1)–N(2)                | 103.2(11) |
| O(12)–Zn(1)–O(13) | 115.3(2) | O(12)–Zn(1)–N(2)                | 105.9(10) | O(13)–Zn(1)–N(2)               | 110.3(12) |
| O(1)–Zn(2)–O(5)   | 87.6(2)  | O(1)–Zn(2)–O(11)                | 87.6(2)   | O(1)–Zn(2)–O(13)               | 86.3(3)   |
| O(1)–Zn(2)–N(1)   | 87.0(6)  | O(5)–Zn(2)–O(11)                | 172.4(2)  | O(5)–Zn(2)–O(13)               | 93.5(2)   |
| O(5)–Zn(2)–N(1)   | 91.1(8)  | O(11)–Zn(2)–O(13) <sup>#1</sup> | 92.1(2)   | O(11)–Zn(2)–N(1) <sup>#1</sup> | 82.8(8)   |

Symmetry transformation: #1 1/2-x, 1/2-y, -z
